# Supplementary material for: Divergent Effects of the Enfacement Illusion on Face and Body Image Disturbance Across Female Eating Disorder Risk Groups
Source: Research Square preprint supplement (doi:10.21203/rs.3.rs-5488208/v1), 2025-01-23
Supplement: Supplementary file 1 [file 0631a5cc2a0ee086c0cd4711.docx]

**Supplementary Table S1**

*F-test Results for Fixed Effects*

| Outcome variable | F-test results for fixed effects | | | | |
| --- | --- | --- | --- | --- | --- |
|  | Factor | *F* | *df*1 | *df*2 | *p* |
| **Objective enfacement** | Time | 5.64 | 2 | 445 | **0.004** |
|  | ED Risk | 0.10 | 1 | 220 | 0.754 |
|  | Age | 0.01 | 1 | 219 | 0.941 |
|  | BMI | 0.16 | 1 | 219 | 0.686 |
|  | Ethnicity | 2.73 | 1 | 219 | 0.100 |
|  | Alexithymia | 0.01 | 1 | 220 | 0.914 |
|  | Time * ED Risk Interaction | 0.73 | 2 | 445 | 0.480 |
| **Subjective enfacement** | Time | 2.20 | 1 | 223 | 0.139 |
|  | ED Risk | 0.47 | 1 | 220 | 0.490 |
|  | Age | 4.54 | 1 | 219 | **0.034** |
|  | BMI | 1.44 | 1 | 220 | 0.230 |
|  | Ethnicity | 22.71 | 1 | 220 | **< 0.001** |
|  | Time * ED Risk Interaction | 0.02 | 1 | 222 | 0.880 |
| **Facial attractiveness** | Time | 0.91 | 2 | 448 | 0.404 |
|  | ED Risk | 9.00 | 1 | 220 | **0.003** |
|  | Age | 0.29 | 1 | 220 | 0.590 |
|  | BMI | 0.02 | 1 | 220 | 0.899 |
|  | Ethnicity | 3.98 | 1 | 220 | 0.047 |
|  | Alexithymia | 7.40 | 1 | 220 | **0.007** |
|  | Time * ED Risk Interaction | 0.32 | 2 | 448 | 0.724 |
| **Facial adiposity** | Time | 0.06 | 2 | 447 | 0.941 |
|  | ED Risk | 5.74 | 1 | 220 | **0.017** |
|  | Age | 0.27 | 1 | 219 | 0.604 |
|  | BMI | 6.65 | 1 | 219 | **0.011** |
|  | Ethnicity | 1.25 | 1 | 219 | 0.264 |
|  | Alexithymia | 8.68 | 1 | 219 | **0.004** |
|  | Time * ED Risk Interaction | 0.09 | 2 | 447 | 0.912 |
| **Head dissatisfaction** | Time | 6.36 | 2 | 448 | **0.002** |
|  | ED Risk | 17.28 | 1 | 220 | **< 0.001** |
|  | Age | 0.41 | 1 | 220 | 0.522 |
|  | BMI | 0.22 | 1 | 220 | 0.637 |
|  | Ethnicity | 0.29 | 1 | 220 | 0.593 |
|  | Alexithymia | 22.62 | 1 | 220 | **< 0.001** |
|  | Time * ED Risk Interaction | 9.24 | 2 | 448 | **< 0.001** |
| **Body dissatisfaction** | Time | 7.47 | 2 | 448 | **0.001** |
|  | ED Risk | 30.31 | 1 | 220 | **< 0.001** |
|  | Age | 0.99 | 1 | 220 | 0.321 |
|  | BMI | 6.09 | 1 | 220 | **0.014** |
|  | Ethnicity | 1.32 | 1 | 220 | 0.252 |
|  | Alexithymia | 15.11 | 1 | 220 | **< 0.001** |
|  | Time * ED Risk Interaction | 8.26 | 2 | 448 | **< 0.001** |
| **Dysmorphic concern** | Time | 5.12 | 2 | 448 | **0.006** |
|  | ED Risk | 58.84 | 1 | 220 | **< 0.001** |
|  | Age | 3.92 | 1 | 220 | **0.049** |
|  | BMI | 0.35 | 1 | 220 | 0.552 |
|  | Ethnicity | 10.67 | 1 | 220 | **0.001** |
|  | Alexithymia | 7.45 | 1 | 220 | **0.007** |
|  | Time * ED Risk Interaction | 3.03 | 2 | 448 | **0.049** |

*Note*. F-test statistics correspond to the fixed effects in the models. BMI = body mass index; ED = eating disorder. Significant *p* values bolded.

**Additional Main Analyses:**

***Bootstrapping***

The bootstrapped 95% CIs largely confirmed the patterns observed in the main models. Significant main effects and interactions from the original models remained significant, with bootstrapped CIs excluding zero. Non-significant effects also remained non-significant, as indicated by CIs that included zero. One minor discrepancy was observed for ethnicity in a single model, where the original significance was not supported by the bootstrapped CI. This reflects the variability captured by bootstrapping. These results support the robustness of the original findings.

**New Covariates (Perceived Model Attractiveness and Desirability)**

In addition to the primary models, we re-ran all analyses with an additional covariate: perceived desirability of the model (H1) and self-perceived model attractiveness (H2). **Perceived desirability of the model (H1)** was derived from Item 16 on the Discrete Emotions Questionnaire (DEQ; Harmon-Jones et al., 2016), which assesses emotional responses. Participants rated how desirable they found the model on a scale of 1 (not at all) to 7 (extremely). **Self-perceived model attractiveness (H2)** was derived from Item 6 on the Enfacement Questionnaire (EQ; Panagiotopoulou et al., 2017). Participants rated how attractive they found the model on a scale of -3 (not at all) to 3 (extremely).

Both covariates were derived from the mean score across synchronous and asynchronous conditions, addressing multicollinearity concerns arising from highly correlated predictors. The inclusion of these covariates did not alter the significance of main effects or interactions in any models. Perceived desirability significantly predicted subjective enfacement, while model attractiveness significantly predicted head and body dissatisfaction and dysmorphic concern. Post-hoc tests revealed that higher perceived desirability led to greater subjective enfacement for individuals with low ED risk post-synchronous stimulation.

Additionally, lower perceived model attractiveness was associated with increased head and body dissatisfaction for high ED risk individuals and reduced dysmorphic concern for low ED risk individual’s post-synchronous stimulation. For models using continuous ED symptomatology, H1 model fit remained stable, while H2 showed notably increased explained marginal variance for head and body dissatisfaction (8-11% increases). Pairwise effect sizes increased slightly for H1 (remaining large) but decreased for H2, with body dissatisfaction reducing from large to small. Effect sizes for other measures showed minimal change.

Detailed statistical results, including descriptive statistics, fixed effects, model fit, and post-hoc pairwise comparisons, can be found in the following tables. Given these were supplementary analyses, we only ran post-hoc pairwise comparisons on model’s where the new covariate was significant. Post-hoc analyses revealed significant differences within ED risk groups. Specifically, higher perceived model desirability led to greater subjective enfacement following synchronous stimulation compared to asynchronous stimulation for low ED risk individuals. Additionally, for high ED risk individuals, lower perceived model attractiveness was associated with increased body dissatisfaction post-synchronous stimulation compared to baseline, while low ED risk individuals showed a reduction in dysmorphic concern under similar conditions.

**Supplementary Table S2**

*Fixed Effects Results for All Outcome Variables with Additional Covariates: Model’s Desirability (H1) and Attractiveness (H2)*

| Outcome variable | Fixed effects | b | *t* | *p* |
| --- | --- | --- | --- | --- |
| Subjective enfacement | Time: sync | 0.60 | 2.53 | **0.012** |
|  | ED risk: high | 0.11 | 0.53 | 0.595 |
|  | Age | -0.03 | -1.88 | 0.062 |
|  | BMI | -0.04 | -1.82 | 0.070 |
|  | Ethnicity: Asian | -0.69 | -3.80 | **<0.001** |
|  | Alexithymia | 0.00 | 0.35 | 0.727 |
|  | Perceived model desirability | 0.14 | 2.62 | **0.010** |
|  | Time: sync * ED risk: high | -0.19 | -1.25 | 0.213 |
| **Objective enfacement** | Time: baseline | 5.68 | 2.29 | 0.023 |
| Time: sync | -3.30 | -1.33 | 0.186 |
|  | ED risk: high | -0.15 | -0.06 | 0.953 |
|  | Age | -0.13 | -0.64 | 0.525 |
|  | BMI | 0.28 | 0.97 | 0.332 |
|  | Ethnicity: Asian | 2.25 | 1.01 | 0.314 |
|  | Alexithymia | 0.03 | 0.33 | 0.743 |
|  | Perceived model desirability | -0.24 | -0.35 | 0.725 |
|  | Time: baseline * ED risk: high | -0.57 | -0.35 | 0.724 |
|  | Time: sync * ED risk: high | 2.07 | 1.28 | 0.203 |
| **Facial attractiveness** | Time: baseline | 3.98 | 4.98 | **<0.001** |
|  | Time: sync | 0.06 | 0.38 | 0.704 |
|  | ED risk: high | 0.20 | 1.31 | 0.191 |
|  | Age | -0.55 | -2.80 | **0.006** |
|  | BMI | -0.01 | -0.53 | 0.593 |
|  | Ethnicity: Asian | 0.00 | 0.12 | 0.907 |
|  | Alexithymia | 0.36 | 1.84 | 0.067 |
|  | Perceived model attractiveness | -0.02 | -2.71 | **0.007** |
|  | Time: baseline * ED risk: high | 0.02 | 0.16 | 0.872 |
|  | Time: sync * ED risk: high | -0.06 | -0.60 | 0.547 |
| **Facial adiposity** | Time: baseline | 1.76 | 3.47 | **<0.001** |
|  | Time: sync | 0.04 | 0.35 | 0.728 |
|  | ED risk: high | 0.02 | 0.20 | 0.845 |
|  | Age | 0.30 | 2.39 | **0.018** |
|  | BMI | 0.00 | 0.51 | 0.608 |
|  | Ethnicity: Asian | 0.04 | 2.57 | **0.011** |
|  | Alexithymia | -0.13 | -1.02 | 0.310 |
|  | Perceived model attractiveness | 0.01 | 2.94 | **0.004** |
|  | Time: baseline * ED risk: high | -0.02 | -0.32 | 0.746 |
|  | Time: sync * ED risk: high | 3.98 | 4.98 | **<0.001** |
| **Head dissatisfaction** | Time: baseline | 3.27 | 0.60 | 0.548 |
|  | Time: sync | 2.45 | 2.84 | **0.005** |
|  | ED risk: high | -0.40 | -0.46 | 0.647 |
|  | Age | 5.89 | 4.44 | **<0.001** |
|  | BMI | -0.06 | -0.57 | 0.567 |
|  | Ethnicity: Asian | 0.05 | 0.28 | 0.777 |
|  | Alexithymia | -0.07 | -0.05 | 0.959 |
|  | Perceived model attractiveness | 0.26 | 4.82 | **<0.001** |
|  | Time: baseline * ED risk: high | -2.03 | -3.60 | **<0.001** |
|  | Time: sync * ED risk: high | 0.13 | 0.23 | 0.819 |
| **Body dissatisfaction** | Time: baseline | 2.42 | 0.44 | 0.659 |
|  | Time: sync | 2.09 | 2.94 | **0.003** |
|  | ED risk: high | -0.50 | -0.71 | 0.480 |
|  | Age | 7.38 | 5.59 | **<0.001** |
|  | BMI | -0.09 | -0.91 | 0.366 |
|  | Ethnicity: Asian | 0.37 | 2.21 | **0.028** |
|  | Alexithymia | -2.47 | -1.85 | 0.066 |
|  | Perceived model attractiveness | 0.22 | 3.98 | **<0.001** |
|  | Time: baseline * ED risk: high | -1.41 | -3.05 | **0.002** |
|  | Time: sync * ED risk: high | 0.37 | 0.81 | 0.420 |
| **Dysmorphic concern** | Time: baseline | 20.02 | 3.72 | **<0.001** |
|  | Time: sync | 1.58 | 1.64 | 0.102 |
|  | ED risk: high | -1.50 | -1.56 | 0.119 |
|  | Age | 9.94 | 7.52 | **<0.001** |
|  | BMI | -0.22 | -2.11 | **0.036** |
|  | Ethnicity: Asian | 0.14 | 0.89 | 0.374 |
|  | Alexithymia | -2.94 | -2.23 | **0.026** |
|  | Perceived model attractiveness | 0.14 | 2.69 | **0.008** |
|  | Time: baseline * ED risk: high | -0.67 | -1.06 | 0.289 |
|  | Time: sync * ED risk: high | 0.87 | 1.39 | 0.164 |

*Note.* ED = Eating disorder; b = regression coefficient. Reference categories (time = asynchronous; ED risk = low; ethnicity = Caucasian) were assigned a value of 0; whilst categories shown in the table (time = synchronous; ED risk = high; ethnicity = Asian) were assigned a value of 1. Significant *p* values bolded. Perceived model desirability: Total sample (*M* = 1.95, *SD* = 1.66); high ED risk (*M* = 2.26, *SD* = 2.01); low ED risk (*M* = 1.52, *SD* = 1.15). Perceived model facial attractiveness: Total sample (*M* = -0.39, *SD* = 1.87); high ED risk (*M* = -0.46, *SD* = 1.98); low ED risk (*M* = -0.34, *SD* = 1.78).

**Supplementary Table S3**

### *Random Effects and Model Fit with Additional Covariates: Model’s Desirability (H1) and Attractiveness (H2)*

| Outcome variable | Random effects (variance) | Conditional R² a | Marginal R² b |
| --- | --- | --- | --- |
| **Subjective enfacement** | Intercept: 1.02, residual: 0.51 | 0.72 | 0.15 |
| **Objective enfacement** | Intercept: 173.15, residual: 55.79 | 0.77 | 0.04 |
| **Facial attractiveness** | Intercept: 1.64, residual: 0.27 | 0.88 | 0.11 |
| **Facial adiposity** | Intercept: 0.64, residual: 0.17 | 0.82 | 0.12 |
| **Head dissatisfaction** | Intercept: 77.42, residual: 8.85 | 0.92 | 0.20 |
| **Body dissatisfaction** | Intercept: 79.27, residual: 6.02 | 0.95 | 0.25 |
| **Dysmorphic concern** | Intercept: 74.92, residual: 11.01 | 0.91 | 0.31 |

*Note*. a = variance explained by fixed and random effects; b = variance explained by fixed effects.

**Supplementary Table S4**

### *Post-Hoc Comparisons by Eating Disorder Risk Group with Additional Covariates: Model’s Desirability (H1) and Attractiveness (H2)*

| **Outcome variable** | **ED risk** | **Comparison** | **MD** | t | *p* |
| --- | --- | --- | --- | --- | --- |
| **Subjective enfacement** | **Low** | Time: async - sync | -0.34 | -3.61 | **0.000** |
|  | **High** | Time: async - sync | -0.37 | -3.50 | **0.001** |
| **Head dissatisfaction** | **Low** | Time: async - baseline | -0.42 | -1.11 | 0.877 |
|  |  | Time: async - sync | 0.27 | 0.70 | 0.981 |
|  |  | Time: baseline - sync | 0.69 | 1.81 | 0.458 |
|  | **High** | Time: async - baseline | 1.61 | 3.86 | **0.002** |
|  |  | Time: async - sync | 0.14 | 0.33 | 1.000 |
|  |  | Time: baseline - sync | -1.47 | -3.53 | **0.006** |
| **Body dissatisfaction** | **Low** | Time: async - baseline | -0.68 | -2.18 | 0.077 |
|  |  | Time: async - sync | 0.13 | 0.41 | 0.910 |
|  |  | Time: baseline - sync | 0.81 | 2.59 | **0.027** |
|  | **High** | Time: async - baseline | 0.74 | 2.14 | 0.083 |
|  |  | Time: async - sync | -0.25 | -0.71 | 0.756 |
|  |  | Time: baseline - sync | -0.98 | -2.86 | **0.013** |
| **Dysmorphic concern** | **Low** | Time: async - baseline | -0.91 | -2.16 | 0.079 |
|  |  | Time: async - sync | 0.63 | 1.49 | 0.295 |
|  |  | Time: baseline - sync | 1.54 | 3.66 | **0.001** |
|  | **High** | Time: async - baseline | -0.25 | -0.53 | 0.858 |
|  |  | Time: async - sync | -0.25 | -0.53 | 0.858 |
|  |  | Time: baseline - sync | 0.00 | 0.00 | 1.000 |

Note. Post hoc analyses were run for models with significant covariates. Models controlled for average levels of perceived model desirably (*M* = 1.95) (H1) or perceived model facial attractiveness (*M* = -0.39) (H2).
